# Supplementary material for: DNA methylation changes underlie the long-term association between periodontitis and atherosclerotic cardiovascular disease
Source: Front Cardiovasc Med. 2023 Apr 21;10:1164499. doi: 10.3389/fcvm.2023.1164499 (PMC10160482; doi:10.3389/fcvm.2023.1164499)
Supplement: Supplementary file 1 [file Table1.xlsx]

## Sheet: DMRs hyper
##Databases: KEGG PATHWAY
##Statistical test method: hypergeometric test / Fisher's exact test
##FDR correction method: Benjamini and Hochberg
#Term	Database	ID	Input number	Background number	P-Value	Corrected P-Value	Input	KEGG_ID/KO	Entrez_ID	Hyperlink
PPAR signaling pathway	KEGG PATHWAY	mmu03320	5	82	0.000993516	0.116241	ENSMUSG00000032083|ENSMUSG00000037071|ENSMUSG00000024665|ENSMUSG00000058492|ENSMUSG00000028603	mmu:11806|mmu:20249|mmu:56473|mmu:20280|mmu:20280|	11806|20249|56473|20280|20280|	http://www.genome.jp/kegg-bin/show_pathway?mmu03320/mmu:20280%09red/mmu:56473%09red/mmu:11806%09red/mmu:20249%09red
Ribosome	KEGG PATHWAY	mmu03010	6	145	0.00213575	0.124942	ENSMUSG00000060419|ENSMUSG00000081051|ENSMUSG00000084349|ENSMUSG00000084106|ENSMUSG00000047676|ENSMUSG00000100755	mmu:20055|mmu:76808|mmu:27367|mmu:19988|mmu:16785|mmu:66475|	20055|76808|27367|19988|16785|66475|	http://www.genome.jp/kegg-bin/show_pathway?mmu03010/mmu:16785%09red/mmu:20055%09red/mmu:76808%09red/mmu:27367%09red/mmu:19988%09red/mmu:66475%09red
Complement and coagulation cascades	KEGG PATHWAY	mmu04610	4	77	0.00553093	0.145845	ENSMUSG00000033831|ENSMUSG00000028001|ENSMUSG00000071178|ENSMUSG00000055172	mmu:110135|mmu:14161|mmu:20701|mmu:50909|	110135|14161|20701|50909|	http://www.genome.jp/kegg-bin/show_pathway?mmu04610/mmu:14161%09red/mmu:20701%09red/mmu:50909%09red/mmu:110135%09red
Biosynthesis of amino acids	KEGG PATHWAY	mmu01230	4	78	0.0057756	0.145845	ENSMUSG00000037798|ENSMUSG00000028307|ENSMUSG00000083773|ENSMUSG00000081600	mmu:11720|mmu:230163|mmu:100042025|mmu:100042025|	11720|230163|100042025|100042025|	http://www.genome.jp/kegg-bin/show_pathway?mmu01230/mmu:230163%09red/mmu:11720%09red/mmu:100042025%09red
Cysteine and methionine metabolism	KEGG PATHWAY	mmu00270	3	40	0.00623268	0.145845	ENSMUSG00000037798|ENSMUSG00000048087|ENSMUSG00000048538	mmu:11720|mmu:269378|mmu:269378|	11720|269378|269378|	http://www.genome.jp/kegg-bin/show_pathway?mmu00270/mmu:11720%09red/mmu:269378%09red
Primary bile acid biosynthesis	KEGG PATHWAY	mmu00120	2	16	0.0105507	0.195972	ENSMUSG00000028603|ENSMUSG00000058492	mmu:20280|mmu:20280|	20280|20280|	http://www.genome.jp/kegg-bin/show_pathway?mmu00120/mmu:20280%09red
Selenocompound metabolism	KEGG PATHWAY	mmu00450	2	17	0.0117248	0.195972	ENSMUSG00000049091|ENSMUSG00000108806	mmu:20768|mmu:20768|	20768|20768|	http://www.genome.jp/kegg-bin/show_pathway?mmu00450/mmu:20768%09red
Legionellosis	KEGG PATHWAY	mmu05134	3	58	0.0162171	0.237175	ENSMUSG00000100801|ENSMUSG00000082536|ENSMUSG00000097554	mmu:15481|mmu:13627|mmu:15481|	15481|13627|15481|	http://www.genome.jp/kegg-bin/show_pathway?mmu05134/mmu:15481%09red/mmu:13627%09red
Vitamin digestion and absorption	KEGG PATHWAY	mmu04977	2	24	0.0214136	0.244592	ENSMUSG00000032083|ENSMUSG00000020609	mmu:11806|mmu:238055|	11806|238055|	http://www.genome.jp/kegg-bin/show_pathway?mmu04977/mmu:11806%09red/mmu:238055%09red
Glycolysis / Gluconeogenesis	KEGG PATHWAY	mmu00010	3	65	0.0216078	0.244592	ENSMUSG00000028307|ENSMUSG00000083773|ENSMUSG00000081600	mmu:230163|mmu:100042025|mmu:100042025|	230163|100042025|100042025|	http://www.genome.jp/kegg-bin/show_pathway?mmu00010/mmu:230163%09red/mmu:100042025%09red
Biosynthesis of unsaturated fatty acids	KEGG PATHWAY	mmu01040	2	25	0.0229958	0.244592	ENSMUSG00000037071|ENSMUSG00000024665	mmu:20249|mmu:56473|	20249|56473|	http://www.genome.jp/kegg-bin/show_pathway?mmu01040/mmu:56473%09red/mmu:20249%09red
MAPK signaling pathway	KEGG PATHWAY	mmu04010	6	253	0.0263968	0.257368	ENSMUSG00000100801|ENSMUSG00000004221|ENSMUSG00000080058|ENSMUSG00000031137|ENSMUSG00000097554|ENSMUSG00000071076	mmu:15481|mmu:16151|mmu:16478|mmu:14168|mmu:15481|mmu:16478|	15481|16151|16478|14168|15481|16478|	http://www.genome.jp/kegg-bin/show_pathway?mmu04010/mmu:14168%09red/mmu:15481%09red/mmu:16151%09red/mmu:16478%09red
Fat digestion and absorption	KEGG PATHWAY	mmu04975	2	40	0.0518308	0.466477	ENSMUSG00000032083|ENSMUSG00000020609	mmu:11806|mmu:238055|	11806|238055|	http://www.genome.jp/kegg-bin/show_pathway?mmu04975/mmu:11806%09red/mmu:238055%09red
Alzheimer's disease	KEGG PATHWAY	mmu05010	4	173	0.0695708	0.557983	ENSMUSG00000002985|ENSMUSG00000003072|ENSMUSG00000083773|ENSMUSG00000081600	mmu:11816|mmu:66043|mmu:100042025|mmu:100042025|	11816|66043|100042025|100042025|	http://www.genome.jp/kegg-bin/show_pathway?mmu05010/mmu:11816%09red/mmu:100042025%09red/mmu:66043%09red
Fatty acid metabolism	KEGG PATHWAY	mmu01212	2	50	0.0754836	0.557983	ENSMUSG00000037071|ENSMUSG00000024665	mmu:20249|mmu:56473|	20249|56473|	http://www.genome.jp/kegg-bin/show_pathway?mmu01212/mmu:56473%09red/mmu:20249%09red
Carbon metabolism	KEGG PATHWAY	mmu01200	3	111	0.0778693	0.557983	ENSMUSG00000028307|ENSMUSG00000083773|ENSMUSG00000081600	mmu:230163|mmu:100042025|mmu:100042025|	230163|100042025|100042025|	http://www.genome.jp/kegg-bin/show_pathway?mmu01200/mmu:230163%09red/mmu:100042025%09red
Toxoplasmosis	KEGG PATHWAY	mmu05145	3	113	0.0810744	0.557983	ENSMUSG00000100801|ENSMUSG00000004221|ENSMUSG00000097554	mmu:15481|mmu:16151|mmu:15481|	15481|16151|15481|	http://www.genome.jp/kegg-bin/show_pathway?mmu05145/mmu:15481%09red/mmu:16151%09red
Acute myeloid leukemia	KEGG PATHWAY	mmu05221	2	57	0.0936864	0.581605	ENSMUSG00000034957|ENSMUSG00000004221	mmu:12606|mmu:16151|	12606|16151|	http://www.genome.jp/kegg-bin/show_pathway?mmu05221/mmu:16151%09red/mmu:12606%09red
Leukocyte transendothelial migration	KEGG PATHWAY	mmu04670	3	121	0.0944486	0.581605	ENSMUSG00000029580|ENSMUSG00000041378|ENSMUSG00000070473	mmu:11461|mmu:12741|mmu:12739|	11461|12741|12739|	http://www.genome.jp/kegg-bin/show_pathway?mmu04670/mmu:12739%09red/mmu:11461%09red/mmu:12741%09red
Osteoclast differentiation	KEGG PATHWAY	mmu04380	3	126	0.103237	0.59343	ENSMUSG00000004221|ENSMUSG00000071076|ENSMUSG00000080058	mmu:16151|mmu:16478|mmu:16478|	16151|16478|16478|	http://www.genome.jp/kegg-bin/show_pathway?mmu04380/mmu:16151%09red/mmu:16478%09red
Platelet activation	KEGG PATHWAY	mmu04611	3	131	0.112336	0.59343	ENSMUSG00000033831|ENSMUSG00000028001|ENSMUSG00000029580	mmu:110135|mmu:14161|mmu:11461|	110135|14161|11461|	http://www.genome.jp/kegg-bin/show_pathway?mmu04611/mmu:11461%09red/mmu:14161%09red/mmu:110135%09red
Epstein-Barr virus infection	KEGG PATHWAY	mmu05169	4	212	0.120632	0.59343	ENSMUSG00000100801|ENSMUSG00000022710|ENSMUSG00000004221|ENSMUSG00000097554	mmu:15481|mmu:252870|mmu:16151|mmu:15481|	15481|252870|16151|15481|	http://www.genome.jp/kegg-bin/show_pathway?mmu05169/mmu:252870%09red/mmu:15481%09red/mmu:16151%09red
Hepatitis C	KEGG PATHWAY	mmu05160	3	136	0.121729	0.59343	ENSMUSG00000004221|ENSMUSG00000041378|ENSMUSG00000070473	mmu:16151|mmu:12741|mmu:12739|	16151|12741|12739|	http://www.genome.jp/kegg-bin/show_pathway?mmu05160/mmu:12739%09red/mmu:16151%09red/mmu:12741%09red
Tight junction	KEGG PATHWAY	mmu04530	3	136	0.121729	0.59343	ENSMUSG00000029580|ENSMUSG00000041378|ENSMUSG00000070473	mmu:11461|mmu:12741|mmu:12739|	11461|12741|12739|	http://www.genome.jp/kegg-bin/show_pathway?mmu04530/mmu:12739%09red/mmu:11461%09red/mmu:12741%09red
Arrhythmogenic right ventricular cardiomyopathy (ARVC)	KEGG PATHWAY	mmu05412	2	74	0.142119	0.631834	ENSMUSG00000029580|ENSMUSG00000045103	mmu:11461|mmu:13405|	11461|13405|	http://www.genome.jp/kegg-bin/show_pathway?mmu05412/mmu:13405%09red/mmu:11461%09red
Gastric acid secretion	KEGG PATHWAY	mmu04971	2	74	0.142119	0.631834	ENSMUSG00000029580|ENSMUSG00000028854	mmu:11461|mmu:20544|	11461|20544|	http://www.genome.jp/kegg-bin/show_pathway?mmu04971/mmu:11461%09red/mmu:20544%09red
Nitrogen metabolism	KEGG PATHWAY	mmu00910	1	17	0.145808	0.631834	ENSMUSG00000027559	mmu:12350|	12350|	http://www.genome.jp/kegg-bin/show_pathway?mmu00910/mmu:12350%09red
Viral myocarditis	KEGG PATHWAY	mmu05416	2	78	0.154176	0.637043	ENSMUSG00000029580|ENSMUSG00000045103	mmu:11461|mmu:13405|	11461|13405|	http://www.genome.jp/kegg-bin/show_pathway?mmu05416/mmu:13405%09red/mmu:11461%09red
Antigen processing and presentation	KEGG PATHWAY	mmu04612	2	81	0.163344	0.637043	ENSMUSG00000100801|ENSMUSG00000097554	mmu:15481|mmu:15481|	15481|15481|	http://www.genome.jp/kegg-bin/show_pathway?mmu04612/mmu:15481%09red
Peroxisome	KEGG PATHWAY	mmu04146	2	81	0.163344	0.637043	ENSMUSG00000028603|ENSMUSG00000058492	mmu:20280|mmu:20280|	20280|20280|	http://www.genome.jp/kegg-bin/show_pathway?mmu04146/mmu:20280%09red
Hypertrophic cardiomyopathy (HCM)	KEGG PATHWAY	mmu05410	2	84	0.172607	0.642453	ENSMUSG00000029580|ENSMUSG00000045103	mmu:11461|mmu:13405|	11461|13405|	http://www.genome.jp/kegg-bin/show_pathway?mmu05410/mmu:13405%09red/mmu:11461%09red
Small cell lung cancer	KEGG PATHWAY	mmu05222	2	85	0.175714	0.642453	ENSMUSG00000004221|ENSMUSG00000067158	mmu:16151|mmu:12829|	16151|12829|	http://www.genome.jp/kegg-bin/show_pathway?mmu05222/mmu:12829%09red/mmu:16151%09red
Dilated cardiomyopathy	KEGG PATHWAY	mmu05414	2	89	0.188225	0.660961	ENSMUSG00000029580|ENSMUSG00000045103	mmu:11461|mmu:13405|	11461|13405|	http://www.genome.jp/kegg-bin/show_pathway?mmu05414/mmu:13405%09red/mmu:11461%09red
Influenza A	KEGG PATHWAY	mmu05164	3	170	0.192074	0.660961	ENSMUSG00000100801|ENSMUSG00000029580|ENSMUSG00000097554	mmu:15481|mmu:11461|mmu:15481|	15481|11461|15481|	http://www.genome.jp/kegg-bin/show_pathway?mmu05164/mmu:11461%09red/mmu:15481%09red
alpha-Linolenic acid metabolism	KEGG PATHWAY	mmu00592	1	25	0.203621	0.665849	ENSMUSG00000024665	mmu:56473|	56473|	http://www.genome.jp/kegg-bin/show_pathway?mmu00592/mmu:56473%09red
mRNA surveillance pathway	KEGG PATHWAY	mmu03015	2	96	0.210391	0.665849	ENSMUSG00000062203|ENSMUSG00000022283	mmu:14852|mmu:18458|	14852|18458|	http://www.genome.jp/kegg-bin/show_pathway?mmu03015/mmu:14852%09red/mmu:18458%09red
Maturity onset diabetes of the young	KEGG PATHWAY	mmu04950	1	26	0.210568	0.665849	ENSMUSG00000037025	mmu:15376|	15376|	http://www.genome.jp/kegg-bin/show_pathway?mmu04950/mmu:15376%09red
Estrogen signaling pathway	KEGG PATHWAY	mmu04915	2	98	0.216774	0.667436	ENSMUSG00000100801|ENSMUSG00000097554	mmu:15481|mmu:15481|	15481|15481|	http://www.genome.jp/kegg-bin/show_pathway?mmu04915/mmu:15481%09red
Mucin type O-Glycan biosynthesis	KEGG PATHWAY	mmu00512	1	28	0.224281	0.672844	ENSMUSG00000092329	mmu:108148|	108148|	http://www.genome.jp/kegg-bin/show_pathway?mmu00512/mmu:108148%09red
Pentose phosphate pathway	KEGG PATHWAY	mmu00030	1	30	0.237758	0.695442	ENSMUSG00000028307	mmu:230163|	230163|	http://www.genome.jp/kegg-bin/show_pathway?mmu00030/mmu:230163%09red
HIF-1 signaling pathway	KEGG PATHWAY	mmu04066	2	111	0.258573	0.719121	ENSMUSG00000083773|ENSMUSG00000081600	mmu:100042025|mmu:100042025|	100042025|100042025|	http://www.genome.jp/kegg-bin/show_pathway?mmu04066/mmu:100042025%09red
African trypanosomiasis	KEGG PATHWAY	mmu05143	1	34	0.264016	0.719121	ENSMUSG00000032083	mmu:11806|	11806|	http://www.genome.jp/kegg-bin/show_pathway?mmu05143/mmu:11806%09red
Primary immunodeficiency	KEGG PATHWAY	mmu05340	1	35	0.270439	0.719121	ENSMUSG00000004221	mmu:16151|	16151|	http://www.genome.jp/kegg-bin/show_pathway?mmu05340/mmu:16151%09red
Fructose and mannose metabolism	KEGG PATHWAY	mmu00051	1	35	0.270439	0.719121	ENSMUSG00000028307	mmu:230163|	230163|	http://www.genome.jp/kegg-bin/show_pathway?mmu00051/mmu:230163%09red
Thyroid hormone signaling pathway	KEGG PATHWAY	mmu04919	2	118	0.281159	0.720101	ENSMUSG00000029580|ENSMUSG00000028854	mmu:11461|mmu:20544|	11461|20544|	http://www.genome.jp/kegg-bin/show_pathway?mmu04919/mmu:11461%09red/mmu:20544%09red
Base excision repair	KEGG PATHWAY	mmu03410	1	37	0.283117	0.720101	ENSMUSG00000036023	mmu:11546|	11546|	http://www.genome.jp/kegg-bin/show_pathway?mmu03410/mmu:11546%09red
Regulation of actin cytoskeleton	KEGG PATHWAY	mmu04810	3	217	0.300702	0.725614	ENSMUSG00000029580|ENSMUSG00000031137|ENSMUSG00000028854	mmu:11461|mmu:14168|mmu:20544|	11461|14168|20544|	http://www.genome.jp/kegg-bin/show_pathway?mmu04810/mmu:11461%09red/mmu:14168%09red/mmu:20544%09red
Nicotine addiction	KEGG PATHWAY	mmu05033	1	40	0.301724	0.725614	ENSMUSG00000070570	mmu:72961|	72961|	http://www.genome.jp/kegg-bin/show_pathway?mmu05033/mmu:72961%09red
Intestinal immune network for IgA production	KEGG PATHWAY	mmu04672	1	42	0.313861	0.725614	ENSMUSG00000026417	mmu:18703|	18703|	http://www.genome.jp/kegg-bin/show_pathway?mmu04672/mmu:18703%09red
Pathways in cancer	KEGG PATHWAY	mmu05200	4	323	0.318727	0.725614	ENSMUSG00000034957|ENSMUSG00000004221|ENSMUSG00000031137|ENSMUSG00000067158	mmu:12606|mmu:16151|mmu:14168|mmu:12829|	12606|16151|14168|12829|	http://www.genome.jp/kegg-bin/show_pathway?mmu05200/mmu:12829%09red/mmu:14168%09red/mmu:16151%09red/mmu:12606%09red
Spliceosome	KEGG PATHWAY	mmu03040	2	132	0.326096	0.725614	ENSMUSG00000100801|ENSMUSG00000097554	mmu:15481|mmu:15481|	15481|15481|	http://www.genome.jp/kegg-bin/show_pathway?mmu03040/mmu:15481%09red
Viral carcinogenesis	KEGG PATHWAY	mmu05203	3	229	0.329243	0.725614	ENSMUSG00000029554|ENSMUSG00000022710|ENSMUSG00000004221	mmu:17120|mmu:252870|mmu:16151|	17120|252870|16151|	http://www.genome.jp/kegg-bin/show_pathway?mmu05203/mmu:252870%09red/mmu:17120%09red/mmu:16151%09red
Endocytosis	KEGG PATHWAY	mmu04144	3	231	0.334002	0.725614	ENSMUSG00000100801|ENSMUSG00000097554|ENSMUSG00000032812	mmu:15481|mmu:15481|mmu:69710|	15481|15481|69710|	http://www.genome.jp/kegg-bin/show_pathway?mmu04144/mmu:69710%09red/mmu:15481%09red
Measles	KEGG PATHWAY	mmu05162	2	137	0.341986	0.725614	ENSMUSG00000100801|ENSMUSG00000097554	mmu:15481|mmu:15481|	15481|15481|	http://www.genome.jp/kegg-bin/show_pathway?mmu05162/mmu:15481%09red
Staphylococcus aureus infection	KEGG PATHWAY	mmu05150	1	51	0.36593	0.725614	ENSMUSG00000055172	mmu:50909|	50909|	http://www.genome.jp/kegg-bin/show_pathway?mmu05150/mmu:50909%09red
Parkinson's disease	KEGG PATHWAY	mmu05012	2	147	0.373391	0.725614	ENSMUSG00000003072|ENSMUSG00000019505	mmu:66043|mmu:22187|	66043|22187|	http://www.genome.jp/kegg-bin/show_pathway?mmu05012/mmu:22187%09red/mmu:66043%09red
Hippo signaling pathway	KEGG PATHWAY	mmu04390	2	154	0.395015	0.725614	ENSMUSG00000074637|ENSMUSG00000029580	mmu:20674|mmu:11461|	20674|11461|	http://www.genome.jp/kegg-bin/show_pathway?mmu04390/mmu:11461%09red/mmu:20674%09red
NOD-like receptor signaling pathway	KEGG PATHWAY	mmu04621	1	58	0.403692	0.725614	ENSMUSG00000004221	mmu:16151|	16151|	http://www.genome.jp/kegg-bin/show_pathway?mmu04621/mmu:16151%09red
Cell adhesion molecules (CAMs)	KEGG PATHWAY	mmu04514	2	160	0.413277	0.725614	ENSMUSG00000041378|ENSMUSG00000070473	mmu:12741|mmu:12739|	12741|12739|	http://www.genome.jp/kegg-bin/show_pathway?mmu04514/mmu:12739%09red/mmu:12741%09red
Long-term depression	KEGG PATHWAY	mmu04730	1	61	0.419183	0.725614	ENSMUSG00000071424	mmu:14804|	14804|	http://www.genome.jp/kegg-bin/show_pathway?mmu04730/mmu:14804%09red
Synaptic vesicle cycle	KEGG PATHWAY	mmu04721	1	62	0.424257	0.725614	ENSMUSG00000070570	mmu:72961|	72961|	http://www.genome.jp/kegg-bin/show_pathway?mmu04721/mmu:72961%09red
Metabolic pathways	KEGG PATHWAY	mmu01100	12	1256	0.426804	0.725614	ENSMUSG00000028603|ENSMUSG00000083773|ENSMUSG00000037798|ENSMUSG00000048087|ENSMUSG00000048538|ENSMUSG00000028307|ENSMUSG00000092329|ENSMUSG00000108806|ENSMUSG00000058492|ENSMUSG00000049091|ENSMUSG00000081600|ENSMUSG00000003072	mmu:20280|mmu:100042025|mmu:11720|mmu:269378|mmu:269378|mmu:230163|mmu:108148|mmu:20768|mmu:20280|mmu:20768|mmu:100042025|mmu:66043|	20280|100042025|11720|269378|269378|230163|108148|20768|20280|20768|100042025|66043|	http://www.genome.jp/kegg-bin/show_pathway?mmu01100/mmu:20280%09red/mmu:11720%09red/mmu:66043%09red/mmu:230163%09red/mmu:269378%09red/mmu:20768%09red/mmu:100042025%09red/mmu:108148%09red
Cytosolic DNA-sensing pathway	KEGG PATHWAY	mmu04623	1	63	0.429287	0.725614	ENSMUSG00000004221	mmu:16151|	16151|	http://www.genome.jp/kegg-bin/show_pathway?mmu04623/mmu:16151%09red
RNA transport	KEGG PATHWAY	mmu03013	2	166	0.431264	0.725614	ENSMUSG00000082536|ENSMUSG00000022283	mmu:13627|mmu:18458|	13627|18458|	http://www.genome.jp/kegg-bin/show_pathway?mmu03013/mmu:18458%09red/mmu:13627%09red
Protein processing in endoplasmic reticulum	KEGG PATHWAY	mmu04141	2	169	0.440148	0.725614	ENSMUSG00000100801|ENSMUSG00000097554	mmu:15481|mmu:15481|	15481|15481|	http://www.genome.jp/kegg-bin/show_pathway?mmu04141/mmu:15481%09red
Pancreatic cancer	KEGG PATHWAY	mmu05212	1	66	0.444115	0.725614	ENSMUSG00000004221	mmu:16151|	16151|	http://www.genome.jp/kegg-bin/show_pathway?mmu05212/mmu:16151%09red
RIG-I-like receptor signaling pathway	KEGG PATHWAY	mmu04622	1	68	0.453787	0.725614	ENSMUSG00000004221	mmu:16151|	16151|	http://www.genome.jp/kegg-bin/show_pathway?mmu04622/mmu:16151%09red
Phagosome	KEGG PATHWAY	mmu04145	2	174	0.454784	0.725614	ENSMUSG00000029580|ENSMUSG00000055172	mmu:11461|mmu:50909|	11461|50909|	http://www.genome.jp/kegg-bin/show_pathway?mmu04145/mmu:11461%09red/mmu:50909%09red
Melanoma	KEGG PATHWAY	mmu05218	1	71	0.467982	0.725614	ENSMUSG00000031137	mmu:14168|	14168|	http://www.genome.jp/kegg-bin/show_pathway?mmu05218/mmu:14168%09red
Bile secretion	KEGG PATHWAY	mmu04976	1	72	0.472631	0.725614	ENSMUSG00000028854	mmu:20544|	20544|	http://www.genome.jp/kegg-bin/show_pathway?mmu04976/mmu:20544%09red
Adipocytokine signaling pathway	KEGG PATHWAY	mmu04920	1	72	0.472631	0.725614	ENSMUSG00000004221	mmu:16151|	16151|	http://www.genome.jp/kegg-bin/show_pathway?mmu04920/mmu:16151%09red
B cell receptor signaling pathway	KEGG PATHWAY	mmu04662	1	73	0.477241	0.725614	ENSMUSG00000004221	mmu:16151|	16151|	http://www.genome.jp/kegg-bin/show_pathway?mmu04662/mmu:16151%09red
Chronic myeloid leukemia	KEGG PATHWAY	mmu05220	1	73	0.477241	0.725614	ENSMUSG00000004221	mmu:16151|	16151|	http://www.genome.jp/kegg-bin/show_pathway?mmu05220/mmu:16151%09red
Pertussis	KEGG PATHWAY	mmu05133	1	74	0.481809	0.725614	ENSMUSG00000055172	mmu:50909|	50909|	http://www.genome.jp/kegg-bin/show_pathway?mmu05133/mmu:50909%09red
Adherens junction	KEGG PATHWAY	mmu04520	1	74	0.481809	0.725614	ENSMUSG00000029580	mmu:11461|	11461|	http://www.genome.jp/kegg-bin/show_pathway?mmu04520/mmu:11461%09red
Salivary secretion	KEGG PATHWAY	mmu04970	1	77	0.495279	0.725614	ENSMUSG00000028854	mmu:20544|	20544|	http://www.genome.jp/kegg-bin/show_pathway?mmu04970/mmu:20544%09red
Bacterial invasion of epithelial cells	KEGG PATHWAY	mmu05100	1	77	0.495279	0.725614	ENSMUSG00000029580	mmu:11461|	11461|	http://www.genome.jp/kegg-bin/show_pathway?mmu05100/mmu:11461%09red
Cardiac muscle contraction	KEGG PATHWAY	mmu04260	1	78	0.499691	0.725614	ENSMUSG00000028854	mmu:20544|	20544|	http://www.genome.jp/kegg-bin/show_pathway?mmu04260/mmu:20544%09red
RNA degradation	KEGG PATHWAY	mmu03018	1	78	0.499691	0.725614	ENSMUSG00000022283	mmu:18458|	18458|	http://www.genome.jp/kegg-bin/show_pathway?mmu03018/mmu:18458%09red
Salmonella infection	KEGG PATHWAY	mmu05132	1	79	0.504065	0.725614	ENSMUSG00000029580	mmu:11461|	11461|	http://www.genome.jp/kegg-bin/show_pathway?mmu05132/mmu:11461%09red
Apoptosis	KEGG PATHWAY	mmu04210	1	82	0.516959	0.725614	ENSMUSG00000004221	mmu:16151|	16151|	http://www.genome.jp/kegg-bin/show_pathway?mmu04210/mmu:16151%09red
Progesterone-mediated oocyte maturation	KEGG PATHWAY	mmu04914	1	87	0.537711	0.725614	ENSMUSG00000029554	mmu:17120|	17120|	http://www.genome.jp/kegg-bin/show_pathway?mmu04914/mmu:17120%09red
Herpes simplex infection	KEGG PATHWAY	mmu05168	2	205	0.540339	0.725614	ENSMUSG00000022710|ENSMUSG00000004221	mmu:252870|mmu:16151|	252870|16151|	http://www.genome.jp/kegg-bin/show_pathway?mmu05168/mmu:252870%09red/mmu:16151%09red
Proteoglycans in cancer	KEGG PATHWAY	mmu05205	2	205	0.540339	0.725614	ENSMUSG00000029580|ENSMUSG00000028854	mmu:11461|mmu:20544|	11461|20544|	http://www.genome.jp/kegg-bin/show_pathway?mmu05205/mmu:11461%09red/mmu:20544%09red
ECM-receptor interaction	KEGG PATHWAY	mmu04512	1	88	0.541754	0.725614	ENSMUSG00000067158	mmu:12829|	12829|	http://www.genome.jp/kegg-bin/show_pathway?mmu04512/mmu:12829%09red
Focal adhesion	KEGG PATHWAY	mmu04510	2	207	0.545534	0.725614	ENSMUSG00000029580|ENSMUSG00000067158	mmu:11461|mmu:12829|	11461|12829|	http://www.genome.jp/kegg-bin/show_pathway?mmu04510/mmu:12829%09red/mmu:11461%09red
Protein digestion and absorption	KEGG PATHWAY	mmu04974	1	89	0.545761	0.725614	ENSMUSG00000067158	mmu:12829|	12829|	http://www.genome.jp/kegg-bin/show_pathway?mmu04974/mmu:12829%09red
Prostate cancer	KEGG PATHWAY	mmu05215	1	89	0.545761	0.725614	ENSMUSG00000004221	mmu:16151|	16151|	http://www.genome.jp/kegg-bin/show_pathway?mmu05215/mmu:16151%09red
Rap1 signaling pathway	KEGG PATHWAY	mmu04015	2	214	0.563391	0.730147	ENSMUSG00000029580|ENSMUSG00000031137	mmu:11461|mmu:14168|	11461|14168|	http://www.genome.jp/kegg-bin/show_pathway?mmu04015/mmu:11461%09red/mmu:14168%09red
NF-kappa B signaling pathway	KEGG PATHWAY	mmu04064	1	100	0.587606	0.730147	ENSMUSG00000004221	mmu:16151|	16151|	http://www.genome.jp/kegg-bin/show_pathway?mmu04064/mmu:16151%09red
Toll-like receptor signaling pathway	KEGG PATHWAY	mmu04620	1	101	0.591214	0.730147	ENSMUSG00000004221	mmu:16151|	16151|	http://www.genome.jp/kegg-bin/show_pathway?mmu04620/mmu:16151%09red
PI3K-Akt signaling pathway	KEGG PATHWAY	mmu04151	3	351	0.598256	0.730147	ENSMUSG00000004221|ENSMUSG00000031137|ENSMUSG00000067158	mmu:16151|mmu:14168|mmu:12829|	16151|14168|12829|	http://www.genome.jp/kegg-bin/show_pathway?mmu04151/mmu:12829%09red/mmu:14168%09red/mmu:16151%09red
Chagas disease (American trypanosomiasis)	KEGG PATHWAY	mmu05142	1	103	0.598337	0.730147	ENSMUSG00000004221	mmu:16151|	16151|	http://www.genome.jp/kegg-bin/show_pathway?mmu05142/mmu:16151%09red
Pancreatic secretion	KEGG PATHWAY	mmu04972	1	103	0.598337	0.730147	ENSMUSG00000028854	mmu:20544|	20544|	http://www.genome.jp/kegg-bin/show_pathway?mmu04972/mmu:20544%09red
Retrograde endocannabinoid signaling	KEGG PATHWAY	mmu04723	1	103	0.598337	0.730147	ENSMUSG00000070570	mmu:72961|	72961|	http://www.genome.jp/kegg-bin/show_pathway?mmu04723/mmu:72961%09red
Ras signaling pathway	KEGG PATHWAY	mmu04014	2	229	0.599949	0.730147	ENSMUSG00000004221|ENSMUSG00000031137	mmu:16151|mmu:14168|	16151|14168|	http://www.genome.jp/kegg-bin/show_pathway?mmu04014/mmu:14168%09red/mmu:16151%09red
T cell receptor signaling pathway	KEGG PATHWAY	mmu04660	1	105	0.605336	0.730147	ENSMUSG00000004221	mmu:16151|	16151|	http://www.genome.jp/kegg-bin/show_pathway?mmu04660/mmu:16151%09red
TNF signaling pathway	KEGG PATHWAY	mmu04668	1	109	0.618972	0.738976	ENSMUSG00000004221	mmu:16151|	16151|	http://www.genome.jp/kegg-bin/show_pathway?mmu04668/mmu:16151%09red
Glutamatergic synapse	KEGG PATHWAY	mmu04724	1	114	0.635359	0.750878	ENSMUSG00000070570	mmu:72961|	72961|	http://www.genome.jp/kegg-bin/show_pathway?mmu04724/mmu:72961%09red
Amoebiasis	KEGG PATHWAY	mmu05146	1	119	0.651044	0.761721	ENSMUSG00000067158	mmu:12829|	12829|	http://www.genome.jp/kegg-bin/show_pathway?mmu05146/mmu:12829%09red
Cell cycle	KEGG PATHWAY	mmu04110	1	126	0.671881	0.772913	ENSMUSG00000029554	mmu:17120|	17120|	http://www.genome.jp/kegg-bin/show_pathway?mmu04110/mmu:17120%09red
Axon guidance	KEGG PATHWAY	mmu04360	1	129	0.680428	0.772913	ENSMUSG00000041845	mmu:11854|	11854|	http://www.genome.jp/kegg-bin/show_pathway?mmu04360/mmu:11854%09red
AMPK signaling pathway	KEGG PATHWAY	mmu04152	1	129	0.680428	0.772913	ENSMUSG00000037071	mmu:20249|	20249|	http://www.genome.jp/kegg-bin/show_pathway?mmu04152/mmu:20249%09red
Oxidative phosphorylation	KEGG PATHWAY	mmu00190	1	135	0.696862	0.776503	ENSMUSG00000003072	mmu:66043|	66043|	http://www.genome.jp/kegg-bin/show_pathway?mmu00190/mmu:66043%09red
FoxO signaling pathway	KEGG PATHWAY	mmu04068	1	135	0.696862	0.776503	ENSMUSG00000022710	mmu:252870|	252870|	http://www.genome.jp/kegg-bin/show_pathway?mmu04068/mmu:252870%09red
Signaling pathways regulating pluripotency of stem cells	KEGG PATHWAY	mmu04550	1	140	0.709912	0.782604	ENSMUSG00000074637	mmu:20674|	20674|	http://www.genome.jp/kegg-bin/show_pathway?mmu04550/mmu:20674%09red
Systemic lupus erythematosus	KEGG PATHWAY	mmu05322	1	145	0.722403	0.782604	ENSMUSG00000055172	mmu:50909|	50909|	http://www.genome.jp/kegg-bin/show_pathway?mmu05322/mmu:50909%09red
Hepatitis B	KEGG PATHWAY	mmu05161	1	145	0.722403	0.782604	ENSMUSG00000004221	mmu:16151|	16151|	http://www.genome.jp/kegg-bin/show_pathway?mmu05161/mmu:16151%09red
Adrenergic signaling in cardiomyocytes	KEGG PATHWAY	mmu04261	1	151	0.736688	0.790757	ENSMUSG00000028854	mmu:20544|	20544|	http://www.genome.jp/kegg-bin/show_pathway?mmu04261/mmu:20544%09red
Non-alcoholic fatty liver disease (NAFLD)	KEGG PATHWAY	mmu04932	1	154	0.743553	0.79087	ENSMUSG00000034957	mmu:12606|	12606|	http://www.genome.jp/kegg-bin/show_pathway?mmu04932/mmu:12606%09red
Oxytocin signaling pathway	KEGG PATHWAY	mmu04921	1	158	0.752431	0.793103	ENSMUSG00000029580	mmu:11461|	11461|	http://www.genome.jp/kegg-bin/show_pathway?mmu04921/mmu:11461%09red
Transcriptional misregulation in cancer	KEGG PATHWAY	mmu05202	1	178	0.792433	0.82781	ENSMUSG00000034957	mmu:12606|	12606|	http://www.genome.jp/kegg-bin/show_pathway?mmu05202/mmu:12606%09red
Huntington's disease	KEGG PATHWAY	mmu05016	1	182	0.799625	0.827931	ENSMUSG00000003072	mmu:66043|	66043|	http://www.genome.jp/kegg-bin/show_pathway?mmu05016/mmu:66043%09red
Chemokine signaling pathway	KEGG PATHWAY	mmu04062	1	196	0.822899	0.840362	ENSMUSG00000004221	mmu:16151|	16151|	http://www.genome.jp/kegg-bin/show_pathway?mmu04062/mmu:16151%09red
cAMP signaling pathway	KEGG PATHWAY	mmu04024	1	198	0.825997	0.840362	ENSMUSG00000028854	mmu:20544|	20544|	http://www.genome.jp/kegg-bin/show_pathway?mmu04024/mmu:20544%09red
HTLV-I infection	KEGG PATHWAY	mmu05166	1	277	0.913427	0.917175	ENSMUSG00000004221	mmu:16151|	16151|	http://www.genome.jp/kegg-bin/show_pathway?mmu05166/mmu:16151%09red
Neuroactive ligand-receptor interaction	KEGG PATHWAY	mmu04080	1	282	0.917175	0.917175	ENSMUSG00000071424	mmu:14804|	14804|	http://www.genome.jp/kegg-bin/show_pathway?mmu04080/mmu:14804%09red
--------------------
#Term	Database	ID	Input number	Background number	P-Value	Corrected P-Value	Input	KEGG_ID/KO	Entrez_ID	Hyperlink
--------------------
#Term	Database	ID	Input number	Background number	P-Value	Corrected P-Value	Input	KEGG_ID/KO	Entrez_ID	Hyperlink
--------------------
